# Supplementary material for: Tissue Nonspecific Alkaline Phosphatase Function in Bone and Muscle Progenitor Cells: Control of Mitochondrial Respiration and ATP Production
Source: PubMed Central journal article supplement (PMC7865776; doi:10.3390/ijms22031140), 2021-01-24

Supplementary Figure 1. Cortical and trabecular bone parameters of donor *Alpl<sup>+/+</sup>* and *Alpl<sup>-/-</sup>* tibias.

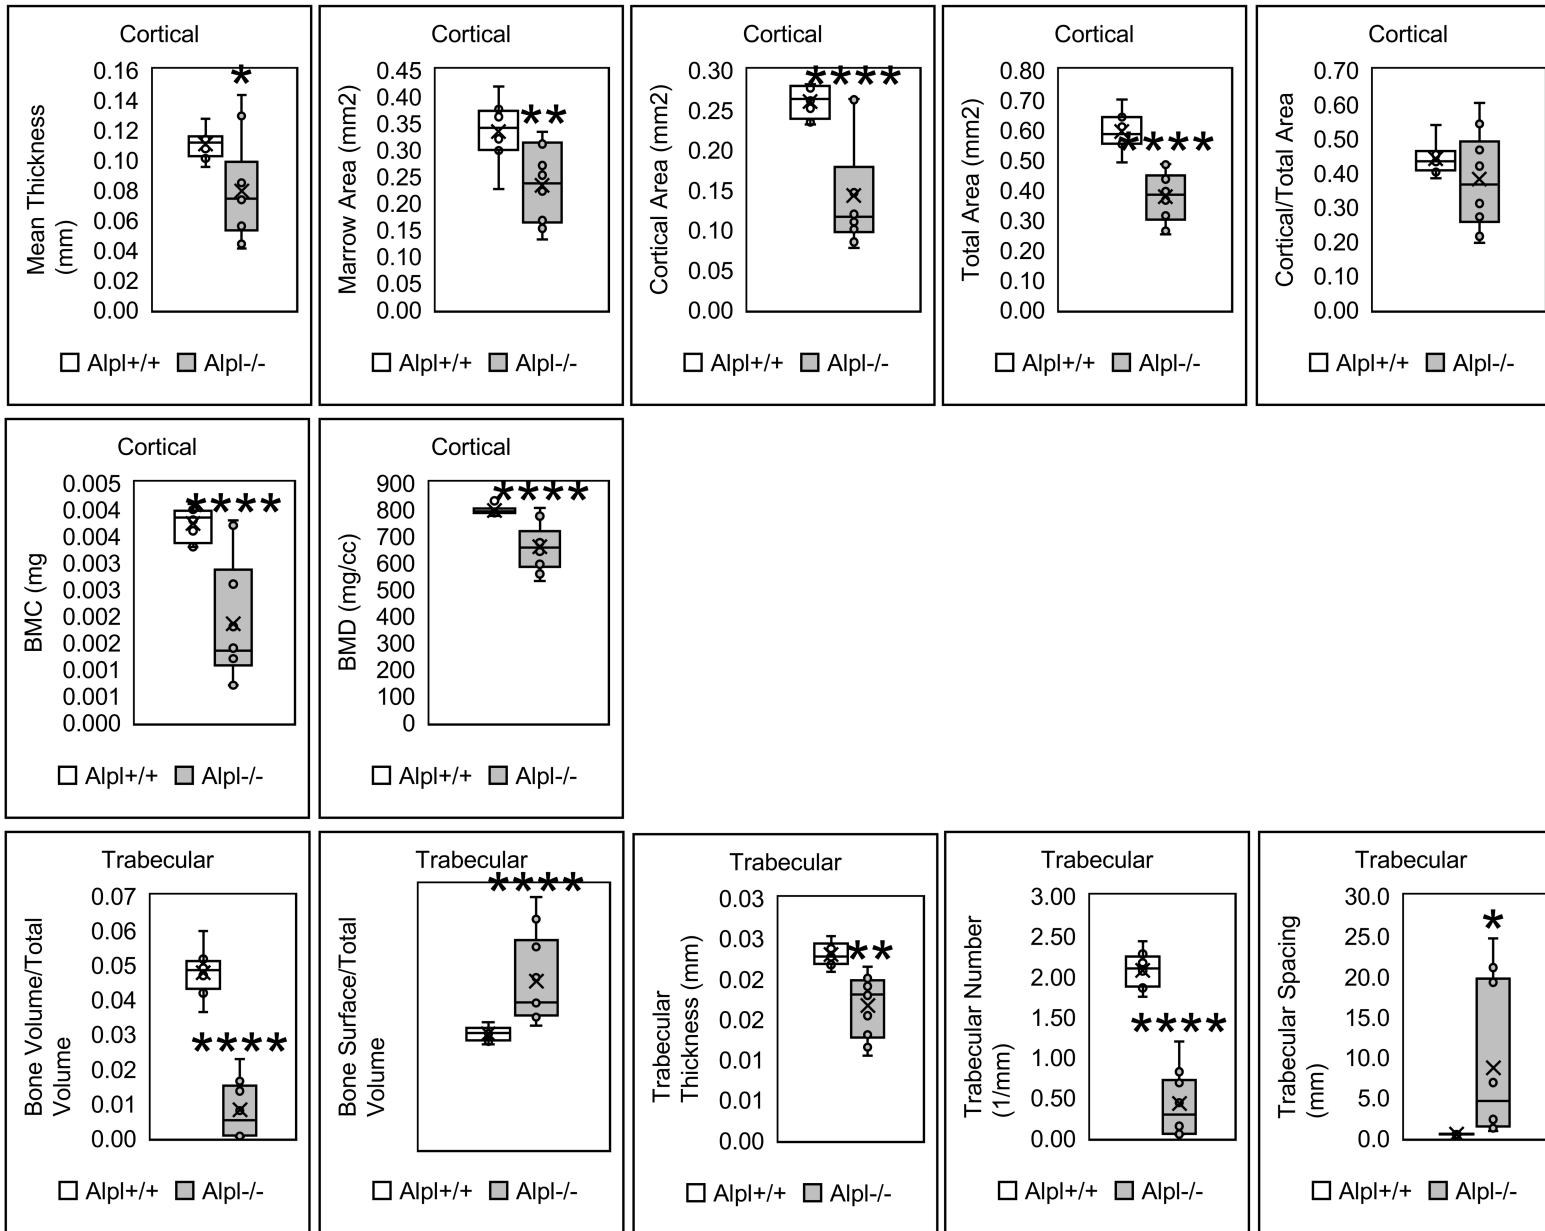

\*p value < 0.05 between genotypes, \*\* p value < 0.01 between genotypes, \*\*\* p value < 0.005 between genotypes, \*\*\*\* p value < 0.001 between genotypes

**Supplementary Figure 2. Skeletal staining demonstrates diminished mineralization and size of *Alpl*<sup>+/+</sup> and *Alpl*<sup>-/-</sup> mouse long bones.** Tibias were stained with alizarin red for bone mineral and alcian blue for cartilage. Note shorter bone length and reduced alizarin staining in *Alpl*<sup>-/-</sup> bones.

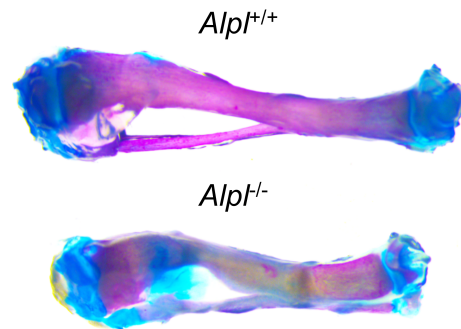

**Supplementary Figure 3. Real time PCR demonstrates that Sol8 cells stably transduced with shRNA for TNAP express significantly less *Alpl* (TNAP) mRNA than Sol8 cells stably transduced with non-target shRNA. NT = non-target.**

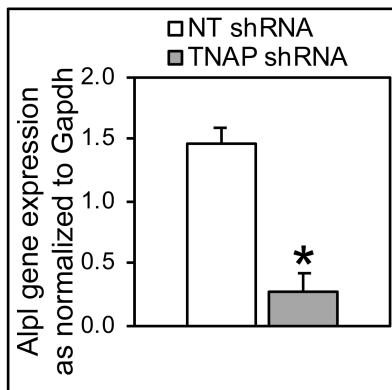

Supplement: ijms-22-01140-s001.pdf [file ijms-22-01140-s001.pdf]
